# Supplementary material for: Alginate Hydrogel Assisted Controllable Interfacial Polymerization for High-Performance Nanofiltration Membranes
Source: MDPI journal article supplement (doi:10.3390/membranes11060435), 2021-06-10
Supplement: s1 [file s1]

Supporting Information for

# **Alginate Hydrogel Assisted Controllable Interfacial Polymerization for High-Performance Nanofiltration Membranes**

**Zhao-Yu Ma, Yu-Ren Xue and Zhi-Kang Xu \***

MOE Key Laboratory of Macromolecular Synthesis and Functionalization, Key Laboratory of Adsorption and Separation Materials & Technologies of Zhejiang Province, Department of Polymer Science & Engineering, Zhejiang University, Hangzhou 310027, China; mazhaoyu@zju.edu.cn (Z.-Y.M.); yrxue4571@zju.edu.cn (Y.-R.X.)

\* Correspondence: zkxu@zju.edu.cn; Tel.: +86-571-87952605

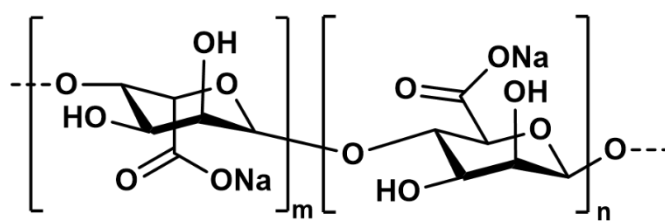

Sodium alginate

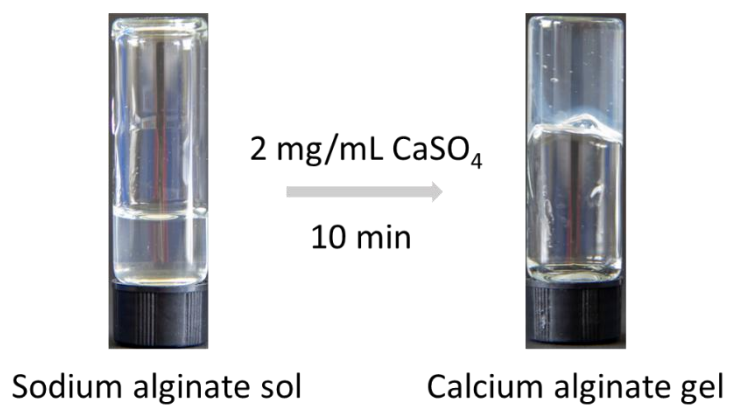

**Figure S1.** Molecular formula of SA and a schematic diagram of the fast sol-gel transformation of SA induced by  $\text{CaSO}_4$ .

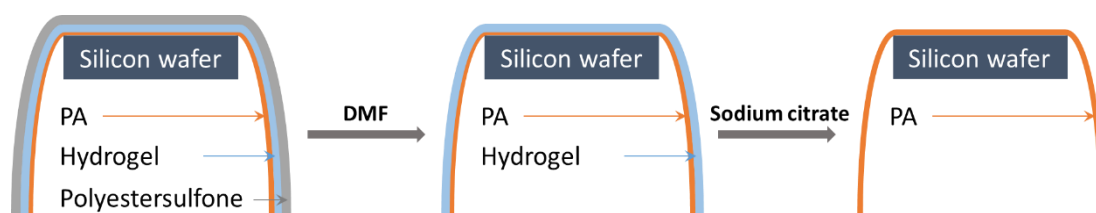

**Figure S2.** Schematic illustration of the isolation process of polyamide nanofilms from a SA-TFC membrane.

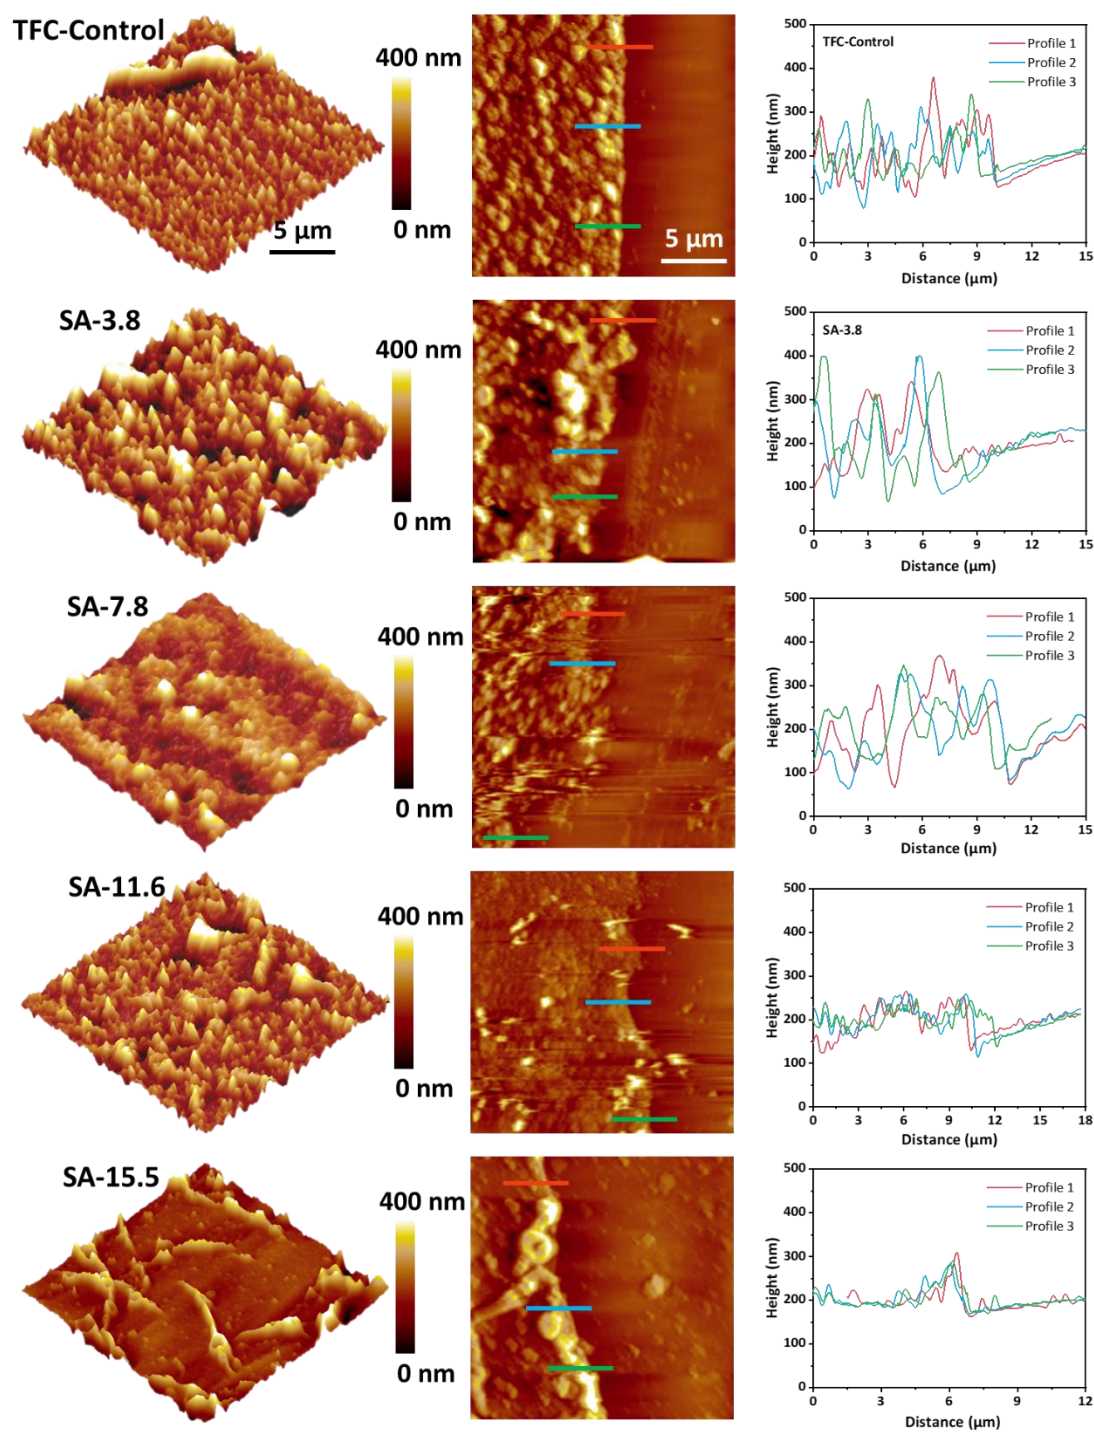

**Figure S3.** AFM images and related height profiles of the polyamide nanofilms isolated from TFC-Control and SA-TFC membranes.

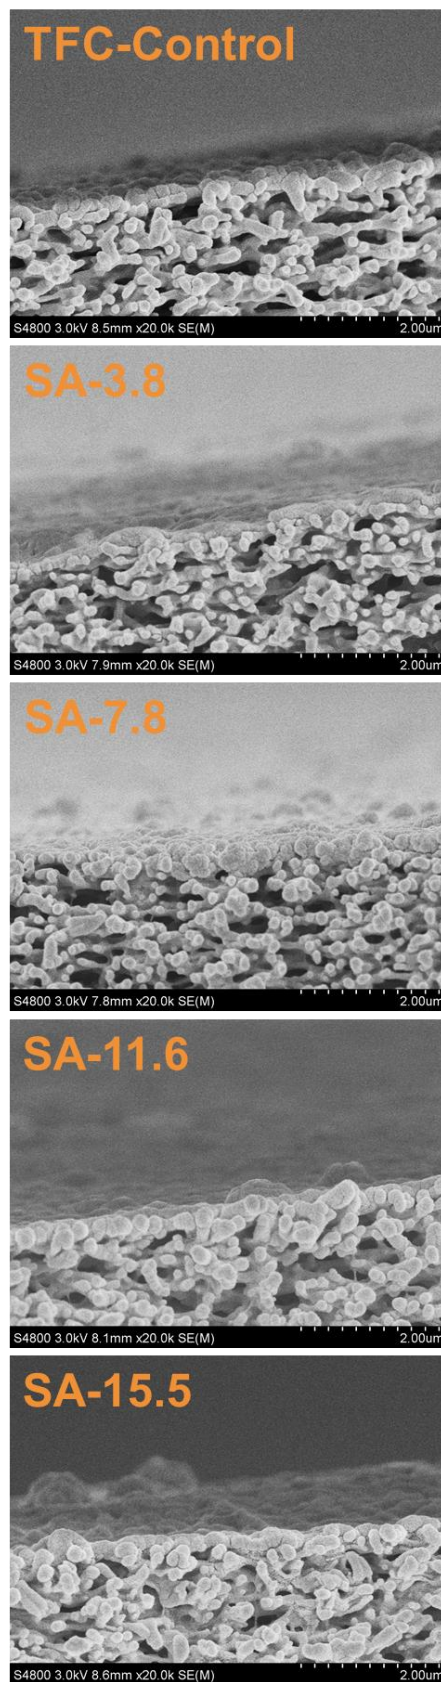

**Figure. S4** SEM cross-section images of TFC-Control and SA-TFC membranes.

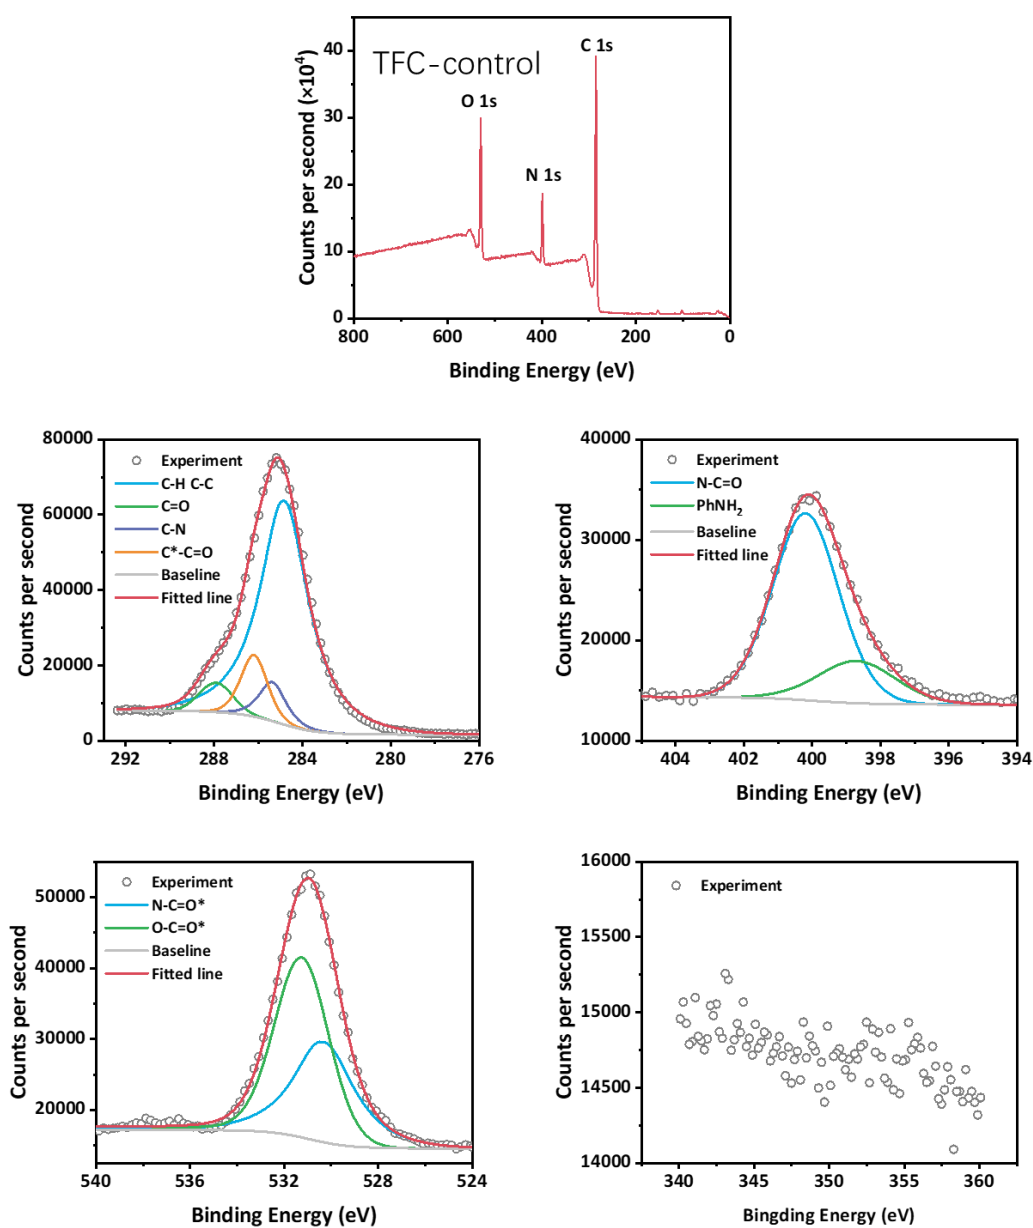

**Figure S5.** XPS full spectrum and the C, N, O, Ca peak fitting spectra of TFC-Control membrane.

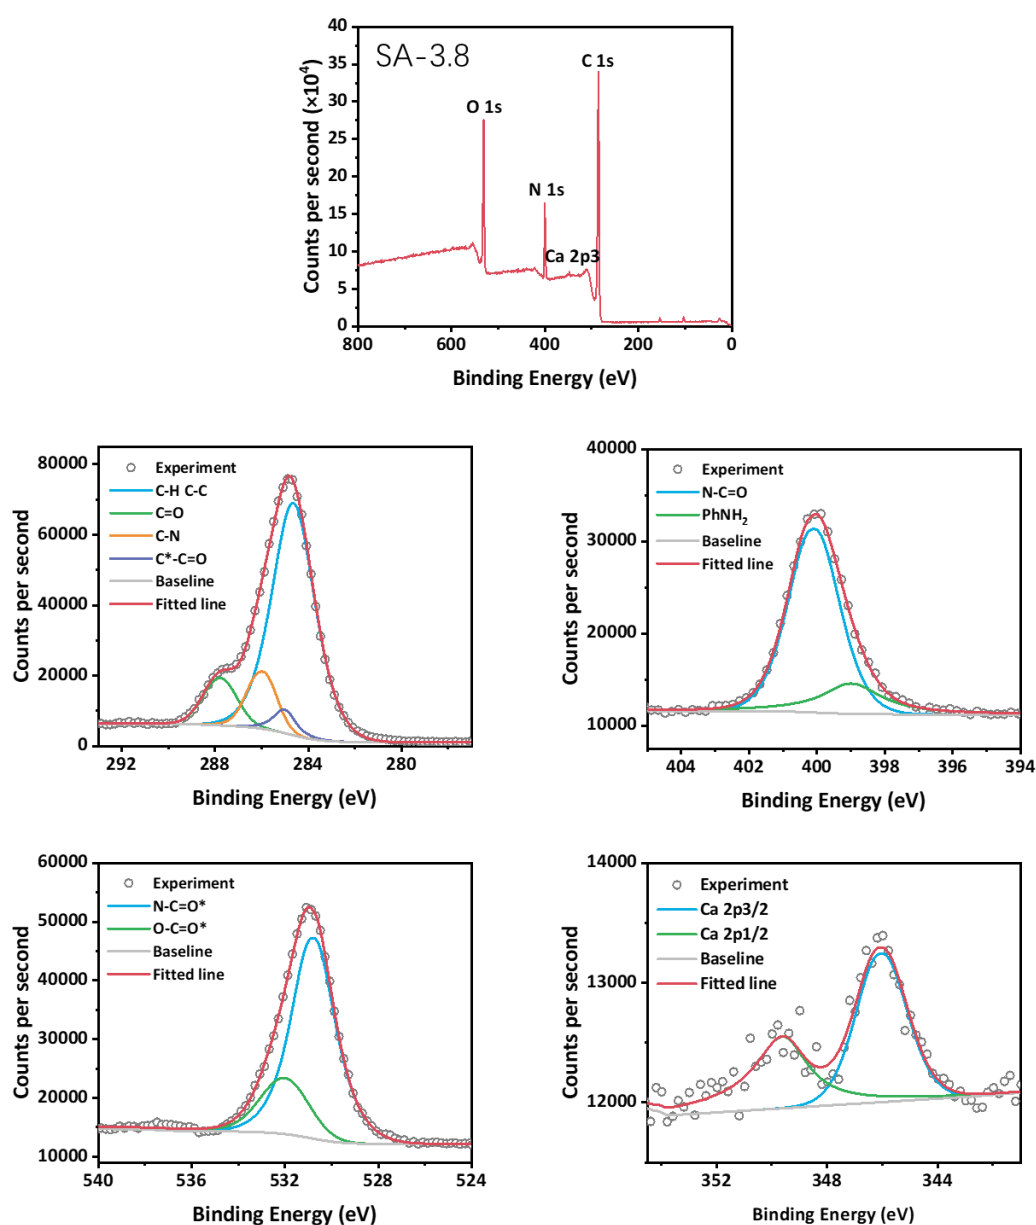

**Figure S6.** XPS full spectrum and the C, N, O, Ca peak fitting spectra of SA-3.8 membrane.

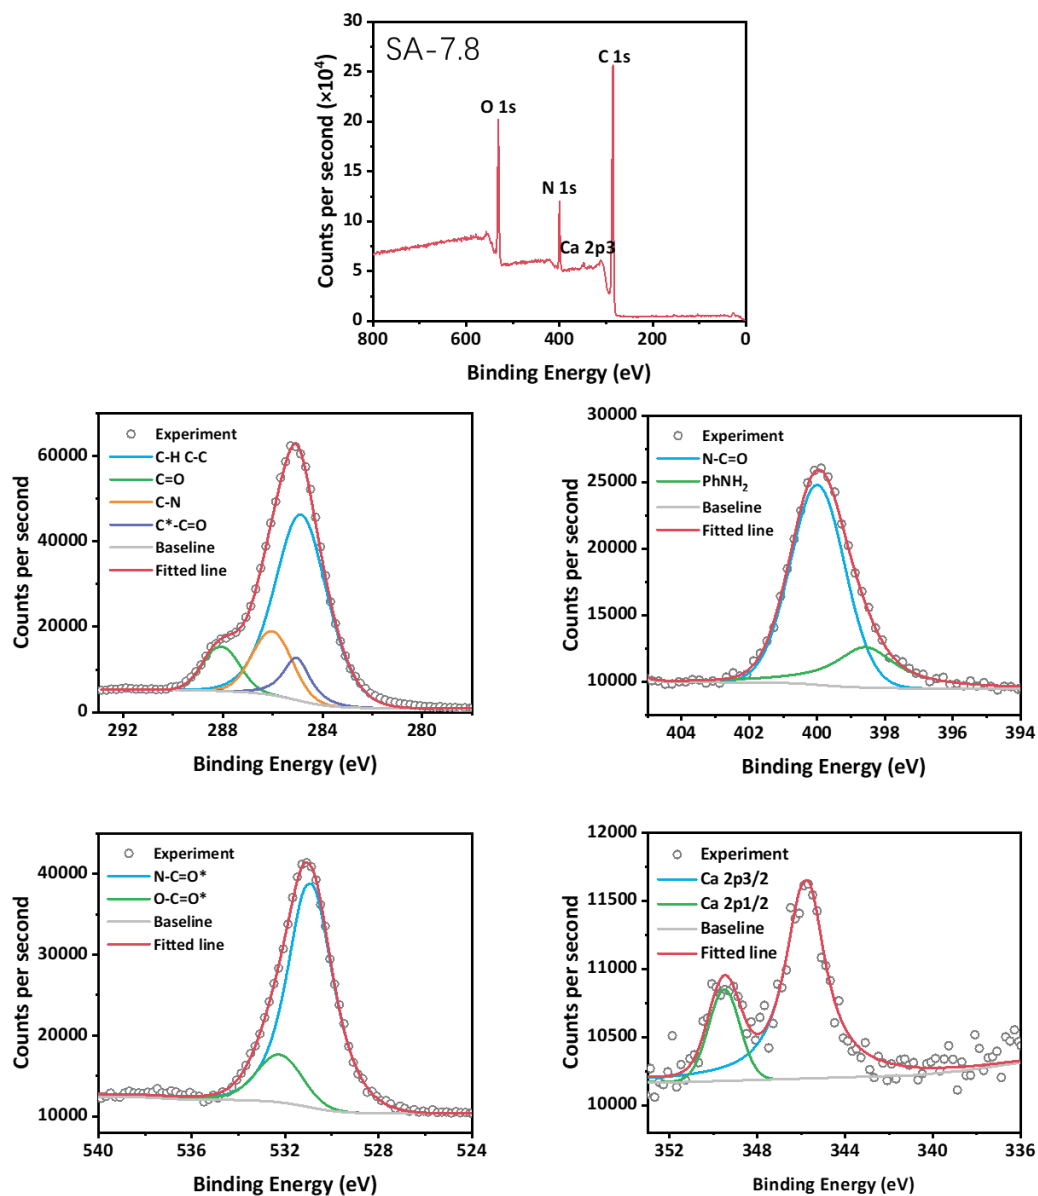

**Figure S7.** XPS full spectrum and the C, N, O, Ca peak fitting spectra of SA-7.8 membrane.



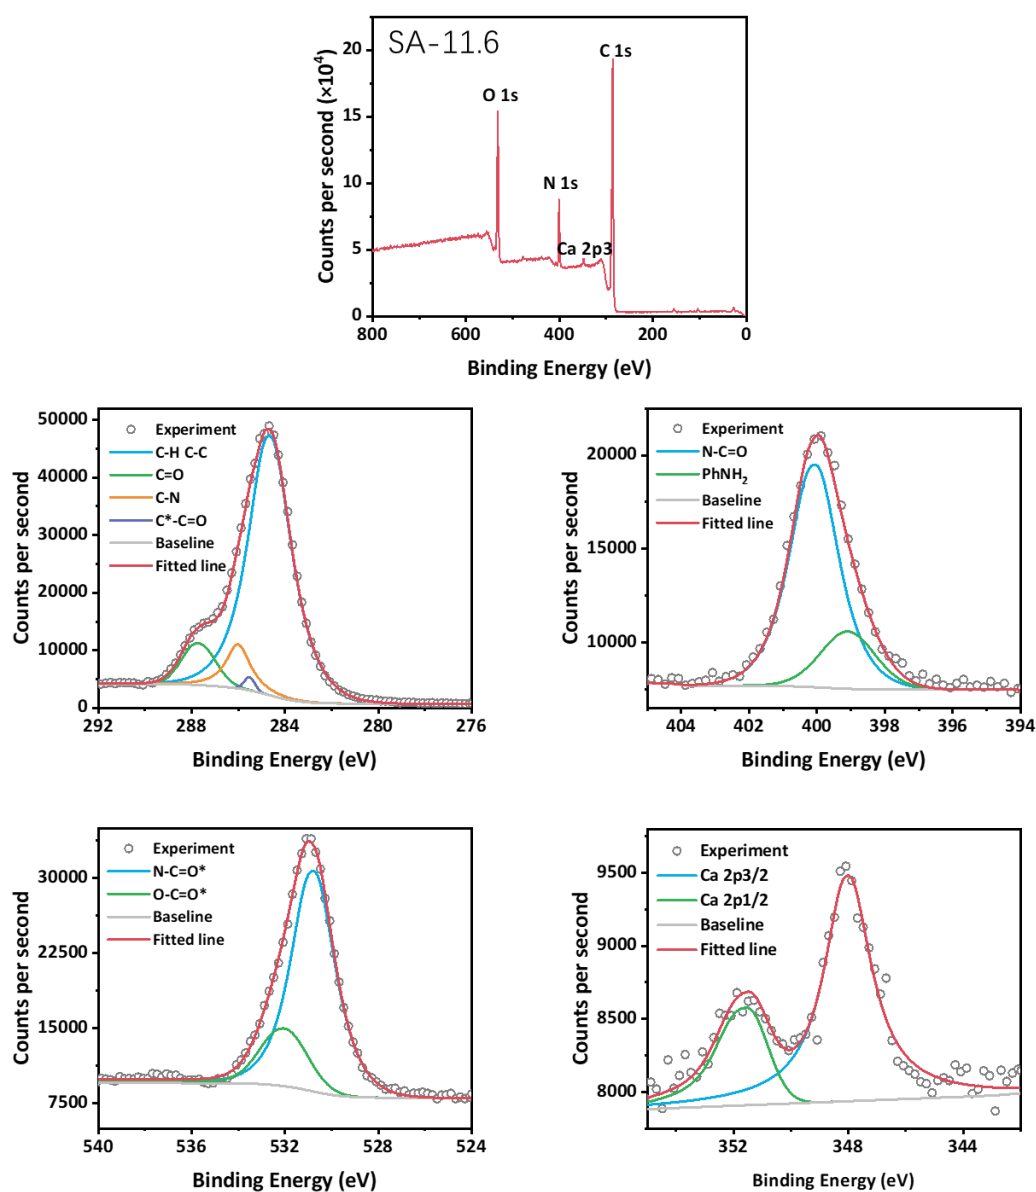

**Figure S8.** XPS full spectrum and the C, N, O, Ca peak fitting spectra of SA-11.6 membrane.

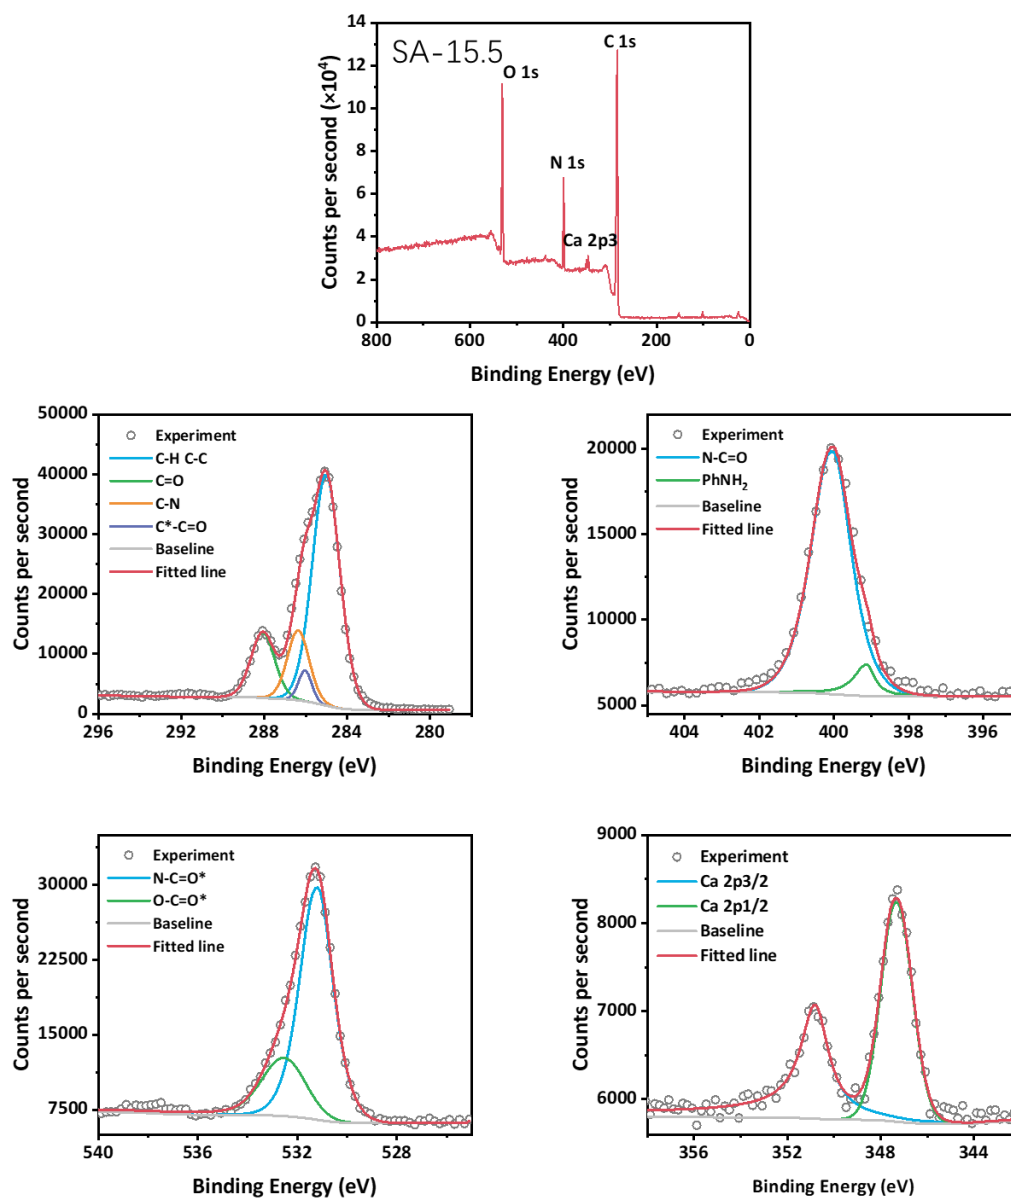

**Figure S9.** XPS full spectrum and the C, N, O, Ca peak fitting spectra of SA-15.5 membrane.

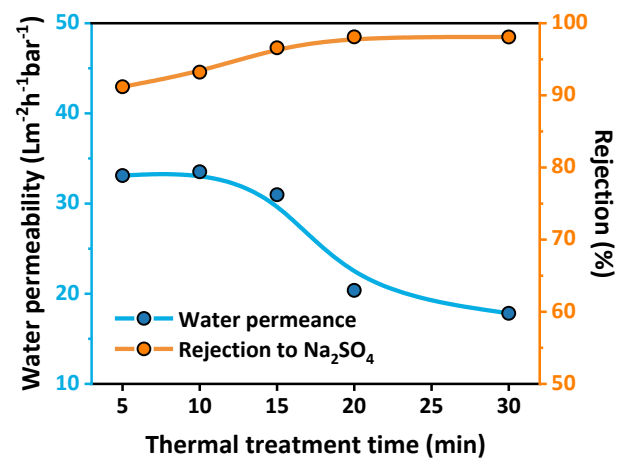

**Figure S10.** The influence of thermal treatment time on nanofiltration performance of SA-15.5
